# Supplementary material for: Transglutaminase 6 Is Colocalized and Interacts with Mutant Huntingtin in Huntington Disease Rodent Animal Models
Source: MDPI journal article supplement (doi:10.3390/ijms22168914), 2021-08-18

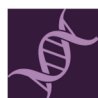

# Transglutaminase 6 Is Colocalized and Interacts with Mutant Huntingtin in Huntington Disease Rodent Animal Models

Anja Schulze-Krebs <sup>1,\*</sup>, Fabio Canneva <sup>1</sup>, Judith Stemick <sup>2</sup>, Anne-Christine Plank <sup>1</sup>, Julia Harrer <sup>1</sup>, Gillian P. Bates <sup>3</sup>, Daniel Aeschlimann <sup>4</sup>, Joan S. Steffan <sup>5,6</sup> and Stephan von Hörsten <sup>1</sup>

**Table S1.** Primary antibodies.

| Antibody     | Source     | Epitope                                                                                                               | mHTT Position         |
|--------------|------------|-----------------------------------------------------------------------------------------------------------------------|-----------------------|
| 1C2          | monoclonal | polyQ                                                                                                                 | polyglutamine stretch |
| 2B7          | monoclonal | MATLEKLMKAFESLKSF                                                                                                     | 1–17                  |
| S830         | polyclonal | Exon1 (53Q)                                                                                                           | 1–90                  |
| mEM48        | monoclonal | GST fusion protein from the first 256 amino acids from human huntingtin with the deletion of the polyglutamine tract. | 1–256                 |
| MAB2166      | monoclonal | GKVLLGEEEALEDDDS                                                                                                      | 443–457               |
| EP867Y       | polyclonal | Synthetic peptide of aa 550–650                                                                                       | 550–650               |
| TG6          | polyclonal | Human full-length neuronal transglutaminase recombinantly product in insect cells.                                    | -                     |
| TG3          | polyclonal | Human full-length epidermal transglutaminase recombinantly product in insect cells.                                   | -                     |
| 81D4         | monoclonal | Synthetic peptide corresponding to N-epsilon-gamma glutamyl lysine (GGEL) bonds                                       | -                     |
| STREP II Tag | monoclonal | ASWSHPQFEKGA                                                                                                          | -                     |
| GFAP         | polyclonal | Glial fibrillary acidic protein                                                                                       | -                     |
| NeuN         | monoclonal | Neuron-Specific Nuclear Protein                                                                                       | -                     |
| GFP          | polyclonal | Fusion protein corresponding to Aequorea Victoria GFP aa 1–246                                                        | -                     |

**Figure S1.** TG-isoforms are widely distributed in the brains of rats.

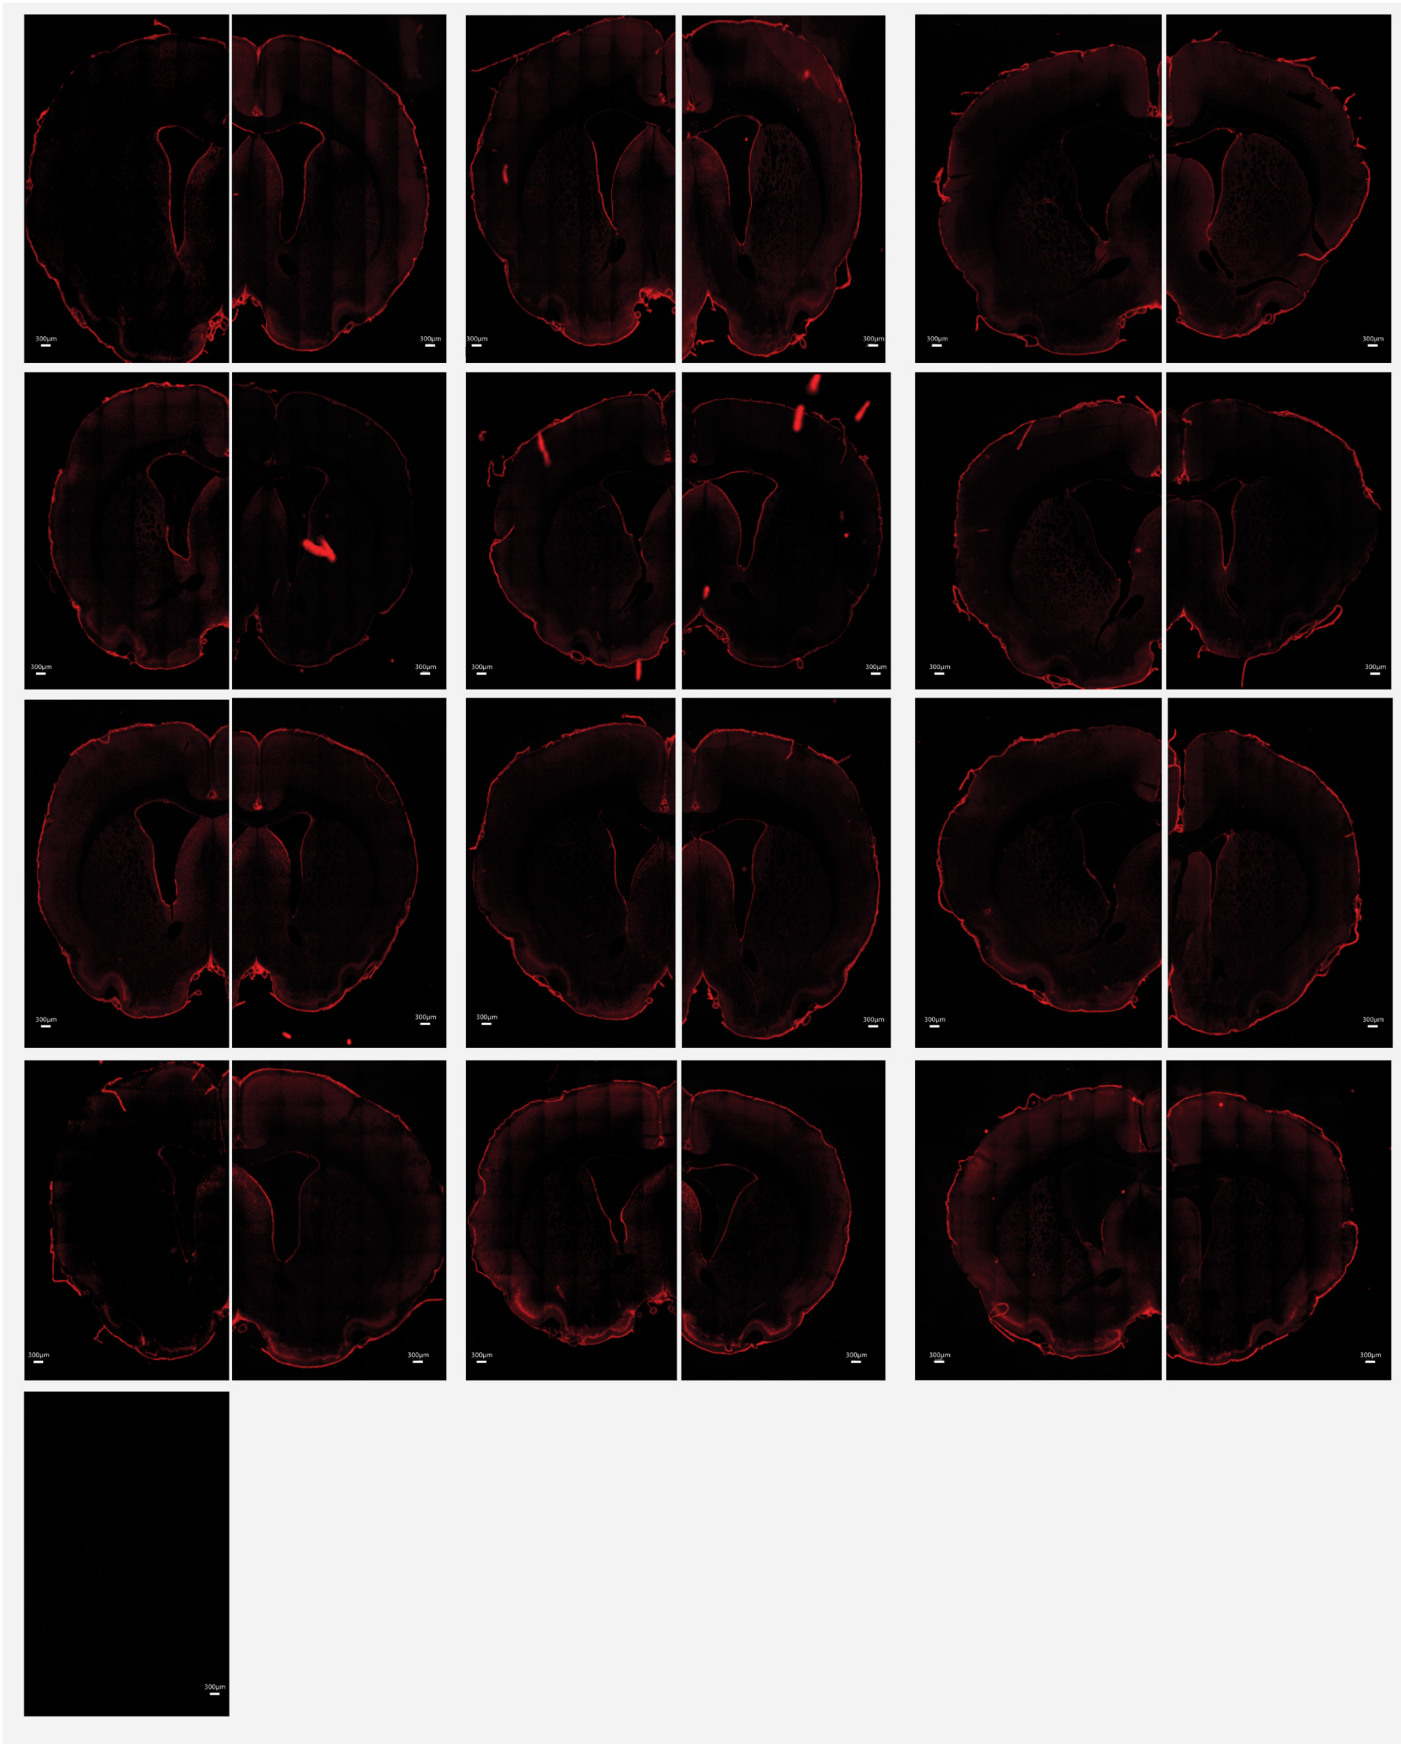

**Figure S2.** (m)HTT-immunopositive cells display a defined regional distribution pattern.

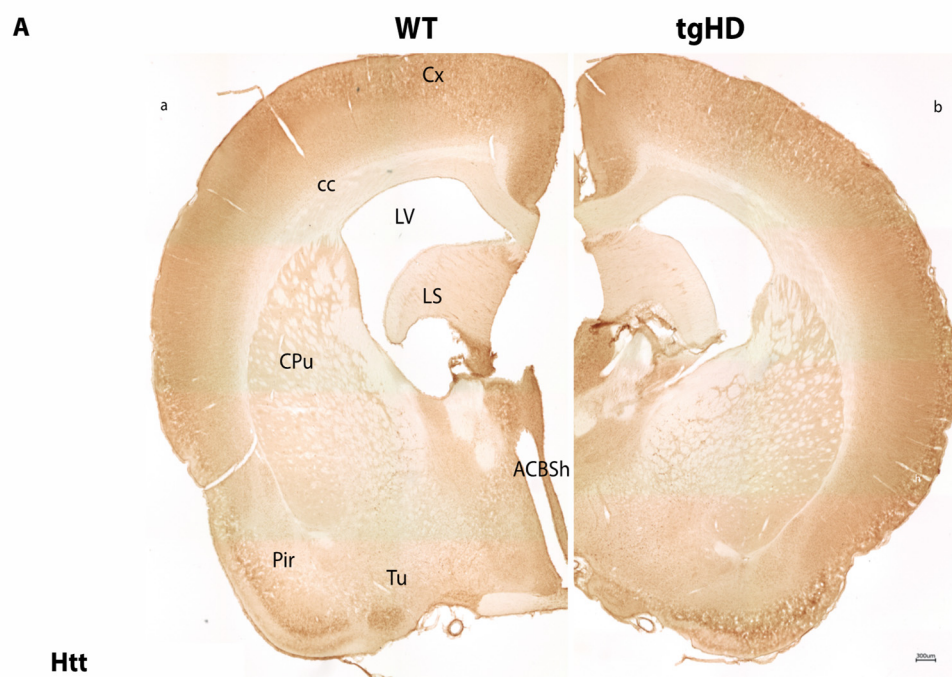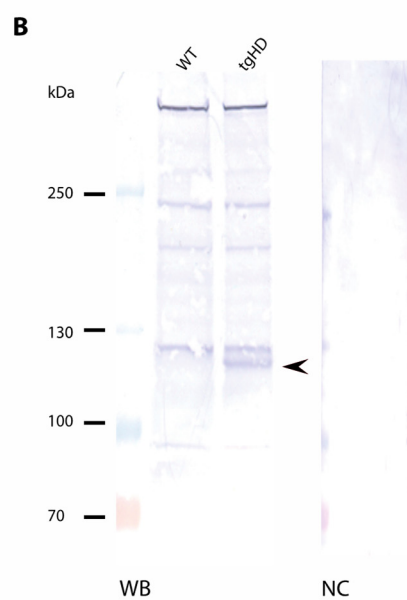

**Figure S3.** Transient transfection of SH-SY5Y cells with HTT exon 1 variants.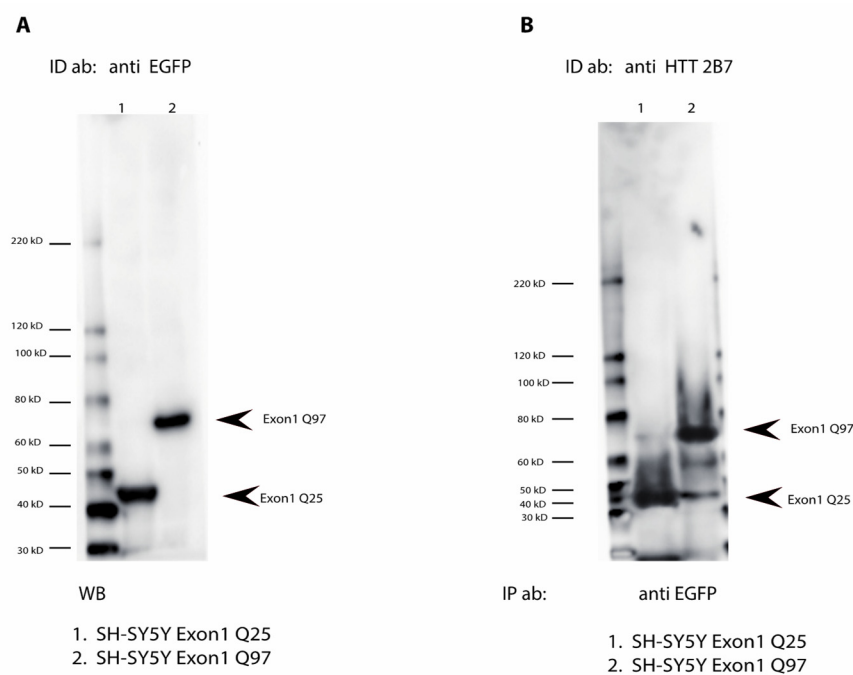**Figure S4.** Representative images of double transfected (TG6, (m)HTT exon 1) aggregate-bearing SH-SY5Y cells.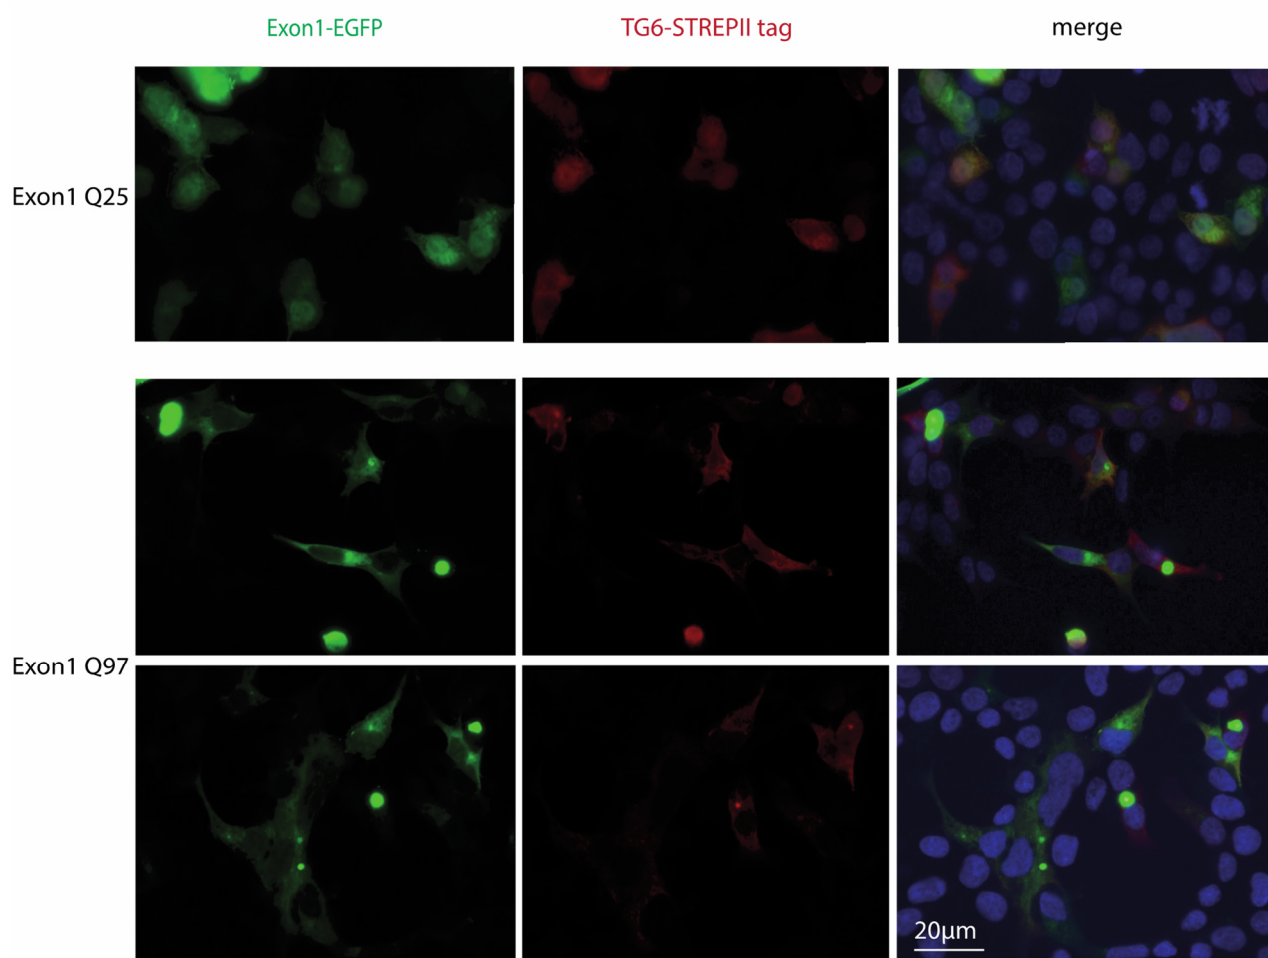

Supplement: s1 [file s1]
